# Supplementary material for: Geospatial Social Determinants of Health Correlate with Disparities in Syphilis and Congenital Syphilis Cases in California
Source: MDPI journal article supplement (doi:10.3390/pathogens11050547), 2022-05-06

**Table S1.** Average number of live births by California Health Places Index (HPI) quartile in California\*, 2018-2020.

| HPI Quartile      | Live Births |
|-------------------|-------------|
| 1 Lowest-scoring  | 40923       |
| 2                 | 37369       |
| 3                 | 42863       |
| 4 Highest-scoring | 46717       |

\* Excluding Los Angeles and San Francisco Counties.

**Figure S1.** Congenital syphilis cases reported to the California Department of Public Health and geocoded to an HPI quartile, by year and HPI quartile, 2013-2020.

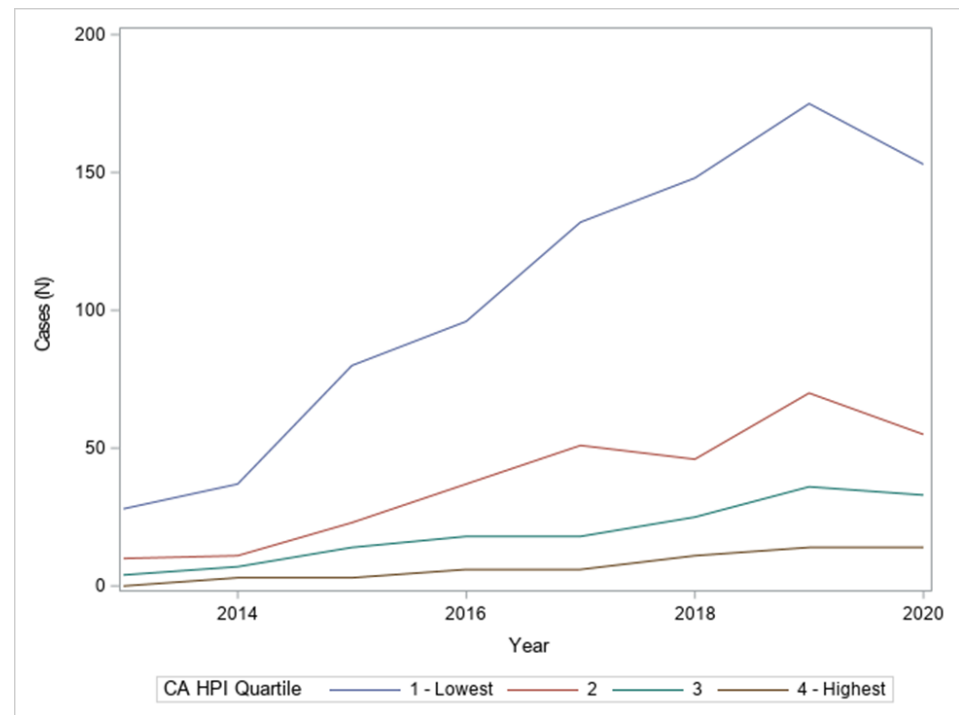

Supplement: s1 [file s1]
